# Supplementary material
Source: PubMed Central journal article supplement (PMC123638)
Supplement: pnas_99_7_4272__1.pdf [file pnas_99_7_4272__1.pdf]

## Supporting Results

**I. Purity of green fluorescence protein (GFP) crystal** (courtesy R. E. Stephens). Fig. 5 shows an SDS acrylamide gel, stained with Coomassie blue, of the GFP crystals used for our optical studies and the deionized water-based mother liquor in which the crystals were formed. The major band at 28 kDa for both the crystal and mother liquor is due to the GFP protein. As seen, there is virtually no material at the dye front and there are very faint auxiliary bands. The GFP protein is >98% pure, as shown by the gel analysis.

**II. X-ray diffraction pattern of GFP crystal at  $\approx 2.7$ -Å resolution** (courtesy T. Senda). Fig. 6 shows an x-ray diffraction pattern of a 15- $\mu$ m-wide crystal formed from the native GFP protein used in our optical studies. The larger crystals were formed more slowly by diluting the GFP solution by three times before dialysis against deionized water. The pattern shows the crystal system to be orthorhombic with a space group of  $P2_12_12_1$  and with lattice constants of  $a = 51.4$  Å,  $b = 62.7$  Å,  $c = 69.0$  Å,  $\alpha = \beta = \gamma = 90^\circ$ . The unit cell in this crystal is made up of four molecules of GFP. The values for the lattice constants obtained on our crystal of native GFP are virtually identical to those obtained on wild-type recombinant GFP by Brejc *et al.* (1).

**III. Derivation of equations (by MS).** Let us assume that each polarization component of excitation illumination excites two orthogonal linearly polarized noncoherent components of fluorescence light. A component of absorbed illumination that is polarized parallel to the long crystal axis  $I_{p1}$  transforms into two components of emitted fluorescence with parallel and perpendicular polarizations  $I_{p2}$  and  $I_{s2}$  respectively:

$$I_{p2} = \alpha_{pp} I_{p1} \text{ and } I_{s2} = \alpha_{sp} I_{p1}.$$

In the same manner, a component of absorbed light with perpendicular polarization  $I_{s1}$  creates two components of emitted light:

$$I_{p2} = \alpha_{ps} I_{s1} \text{ and } I_{s2} = \alpha_{ss} I_{s1}.$$

When two components of excitation radiation are present, then

$$\begin{aligned} I_{p2} &= \alpha_{pp} I_{p1} + \alpha_{ps} I_{s1}, \\ I_{s2} &= \alpha_{sp} I_{p1} + \alpha_{ss} I_{s1}. \end{aligned}$$

Here  $\alpha_{pp}$ ,  $\alpha_{sp}$ ,  $\alpha_{ps}$  and  $\alpha_{ss}$  are proportionality coefficients.

(i) In the case when the polarizer is oriented to the GFP crystal at an angle  $\phi$  and the analyzer is absent, the intensity of fluorescence  $I$  is:

$$I = 0.5(\alpha_{ps} + \alpha_{ss}) I_0 + 0.5((\alpha_{pp} + \alpha_{sp}) - (\alpha_{ps} + \alpha_{ss})) I_0 \cos^2 \varphi, \quad [1]$$

where  $I_0$  is intensity that falls on the polarizer.

The fluorescence becomes maximum at  $I_{\max}$  and minimum at  $I_{\min}$ , where

$$I_{\max} = 0.5(\alpha_{pp} + \alpha_{sp}) I_0, \text{ when } \varphi = 0^\circ \text{ and } 180^\circ, \text{ and} \\ I_{\min} = 0.5(\alpha_{ps} + \alpha_{ss}) I_0, \text{ when } \varphi = 90^\circ \text{ and } 270^\circ.$$

Thus, the intensity ratio of the fluorescence  $\xi_1$  is

$$\xi_1 = \frac{\alpha_{pp} + \alpha_{sp}}{\alpha_{ps} + \alpha_{ss}}.$$

(ii) When the polarizer is absent and the analyzer is oriented at an angle  $\varphi$  to the GFP crystal, the intensity of fluorescence  $I$  is

$$I = 0.5 I_0 (\alpha_{sp} + \alpha_{ss}) + 0.5 I_0 ((\alpha_{pp} + \alpha_{ps}) - (\alpha_{sp} + \alpha_{ss})) \cos^2 \varphi, \quad [2]$$

where  $I_0$  is intensity that falls on the GFP crystal.

The fluorescence then has a maximum at  $I_{\max}$  and minimum at  $I_{\min}$ , where

$$I_{\max} = 0.5(\alpha_{pp} + \alpha_{ps}) I_0, \text{ when } \varphi = 0^\circ \text{ and } 180^\circ, \text{ and} \\ I_{\min} = 0.5(\alpha_{sp} + \alpha_{ss}) I_0, \text{ when } \varphi = 90^\circ \text{ and } 270^\circ.$$

Thus, the polarization ratio  $\xi_2$  in fluorescence beam is

$$\xi_2 = \frac{\alpha_{pp} + \alpha_{ps}}{\alpha_{sp} + \alpha_{ss}}.$$

(iii) In the case when the polarizer is oriented at an angle  $\varphi$  to the GFP crystal and the analyzer is oriented parallel to the polarizer, the intensity of fluorescence  $I$  is described by a formula containing terms  $\cos^2 \varphi$  and  $\cos^4 \varphi$ :

$$I = 0.5(\alpha_{ss} + (\alpha_{ps} + \alpha_{sp} - 2\alpha_{ss}) \cos^2 \varphi + (\alpha_{pp} + \alpha_{ss} - (\alpha_{ps} + \alpha_{sp})) \cos^4 \varphi) I_0, \quad [3]$$

where  $I_0$  is intensity that falls on the polarizer.

The fluorescence becomes maximum at  $I_{\max}$ , and minimum at  $I_{\min}$

$$I_{\max} = 0.5\alpha_{pp} I_0, \text{ when } \varphi = 0^\circ \text{ and } 180^\circ,$$

$$I_{\min} = 0.5\alpha_{ss} I_0, \text{ when } \varphi = 90^\circ \text{ and } 270^\circ.$$

Thus, the fluorescence intensity ratio  $\xi_3$  is

$$\xi_3 = \frac{\alpha_{pp}}{\alpha_{ss}}.$$

(iv) When the polarizer is oriented at an angle  $\varphi$  to the GFP crystal and the analyzer is oriented perpendicular to the polarizer, the fluorescence intensity becomes:

$$I = 0.5(\alpha_{ps} + (\alpha_{pp} + \alpha_{ss} - 2\alpha_{ps})\cos^2\varphi - (\alpha_{pp} + \alpha_{ss} - (\alpha_{ps} + \alpha_{sp}))\cos^4\varphi)I_0, \quad [4]$$

where  $I_0$  is intensity that falls on the polarizer.

The fluorescence has two sets of minima  $I_{\min}'$  for  $\varphi = 0^\circ, 180^\circ$  and  $I_{\min}''$  for  $\varphi = 90^\circ, 270^\circ$ . Moreover,  $I_{\min}' = 0.5\alpha_{sp} I_0$  and  $I_{\min}'' = 0.5\alpha_{ps} I_0$ .

Thus, we get a ratio:  $\xi_4 = \frac{I_{\min}'}{I_{\min}''} = \frac{\alpha_{ps}}{\alpha_{sp}}$ .

Maxima will occur at the following points:

$$\varphi = \tan^{-1} \left( \sqrt{\frac{\alpha_{pp} + \alpha_{ss} - 2\alpha_{sp}}{\alpha_{pp} + \alpha_{ss} - 2\alpha_{ps}}} \right).$$

The position of the maximum corresponds to  $45^\circ$  when  $I_{\min}' = I_{\min}''$  and  $\alpha_{ps} = \alpha_{sp}$  only.

From three of the four measured values  $\xi_1, \xi_2, \xi_3$  and  $\xi_4$ , one can determine the relative values  $\frac{\alpha_{pp}}{\alpha_{ss}}, \frac{\alpha_{ps}}{\alpha_{ss}}$  and  $\frac{\alpha_{sp}}{\alpha_{ss}}$  and then plot the normalized curve  $I(\varphi)$ . For example,

because the values  $\xi_1, \xi_3$  and  $\xi_4$  are known, we find:  $\frac{\alpha_{pp}}{\alpha_{ss}} = \xi_3, \frac{\alpha_{ps}}{\alpha_{ss}} = \frac{\xi_3 - \xi_1}{\xi_1 - \xi_4}$  and

$$\frac{\alpha_{sp}}{\alpha_{ss}} = \frac{\xi_3 - \xi_1}{\xi_4 (\xi_1 - \xi_4)}.$$

Reference:

1. Brejc, K., Sixma, T. K., Kitts, P. A., Kain, S. R., Tsien, R. Y., Ormö, M. & Remington, S. J. (1997) *Proc. Natl. Acad. Sci. USA* **94**, 2306–2311.
